# Supplementary material for: Well-differentiated liver cancers reveal the potential link between ACE2 dysfunction and metabolic breakdown
Source: PubMed Central journal article supplement (PMC8814043; doi:10.1038/s41598-021-03710-0), 2022-02-03

## The Cancer Genome Atlas database (NIH)

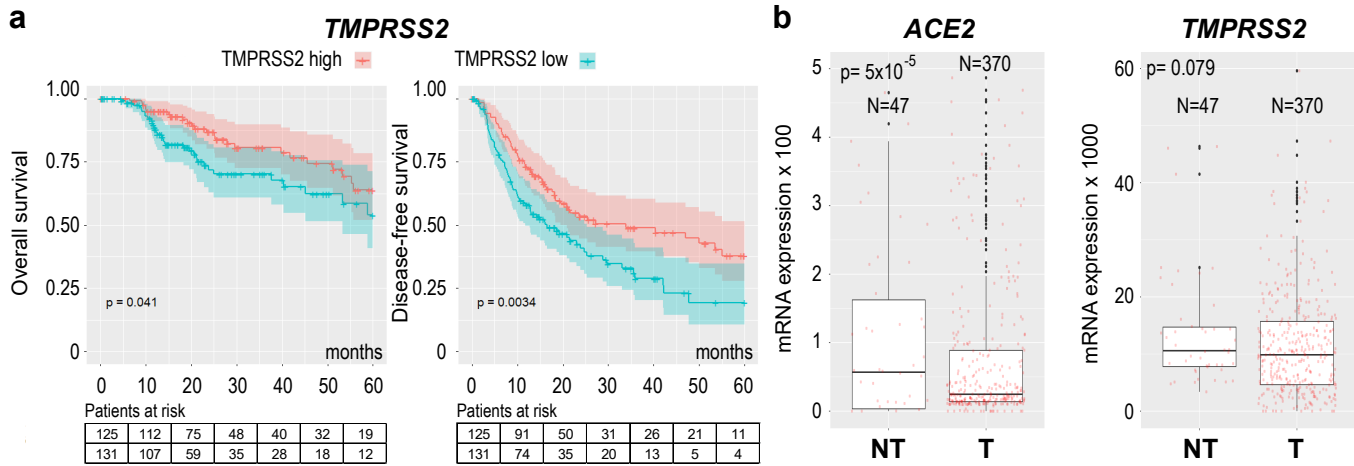

## The Cancer Genome Atlas database (TCGA, 370 HCCs)

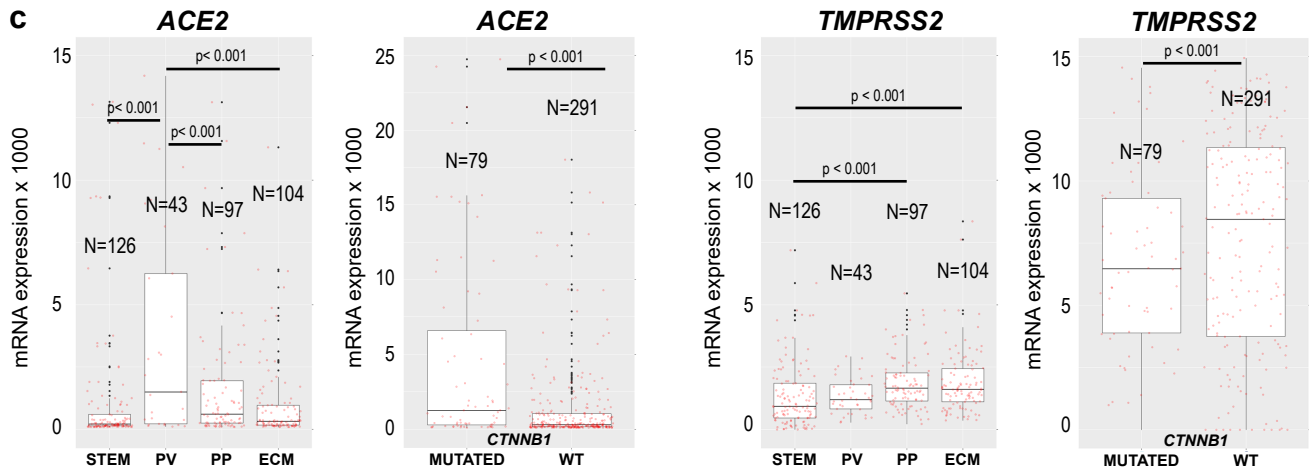

## Désert et al., meta-dataset (1133 HCCs)

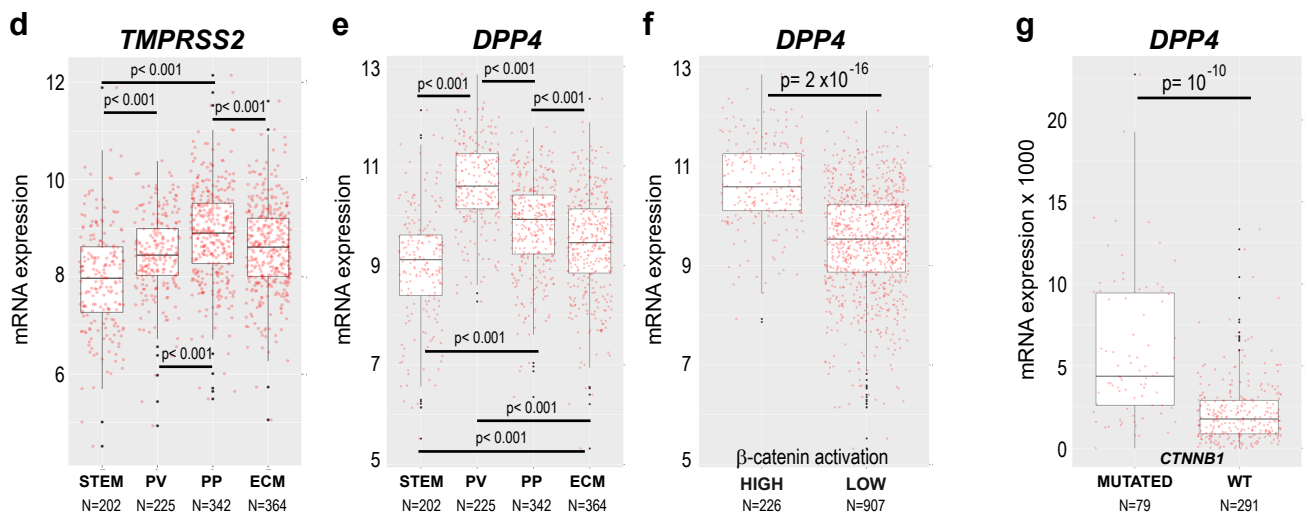

Supplement: 41598_2021_3710_MOESM3_ESM.pdf [file 41598_2021_3710_MOESM3_ESM.pdf]
