# Supplementary material for: Well-differentiated liver cancers reveal the potential link between ACE2 dysfunction and metabolic breakdown
Source: PubMed Central journal article supplement (PMC8814043; doi:10.1038/s41598-021-03710-0), 2022-02-03

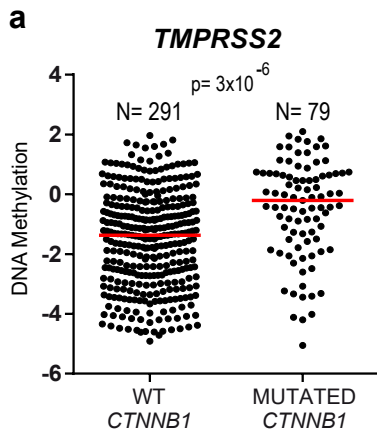

**b**

| Gene of interest   | N=  | Mutation numbers (%) |             | P values    |             |
|--------------------|-----|----------------------|-------------|-------------|-------------|
|                    |     | <i>TERT</i>          | <i>TP53</i> | <i>TERT</i> | <i>TP53</i> |
| <i>ACE2</i> high   | 185 | 1 (0.54)             | 26 (14.05)  | 0.62        | 0.77        |
| <i>ACE2</i> low    | 185 | 3 (1.62)             | 29 (15.68)  |             |             |
| <i>TPRSS2</i> high | 185 | 0 (0)                | 34 (18.4)   | 0.12        | 0.08        |
| <i>TPRSS2</i> low  | 185 | 4 (2.16)             | 21 (11.35)  |             |             |
| <i>DPP4</i> high   | 185 | 0 (0)                | 27 (14.6)   | 0.12        | 1           |
| <i>DPP4</i> low    | 185 | 4 (2.16)             | 28 (15.14)  |             |             |

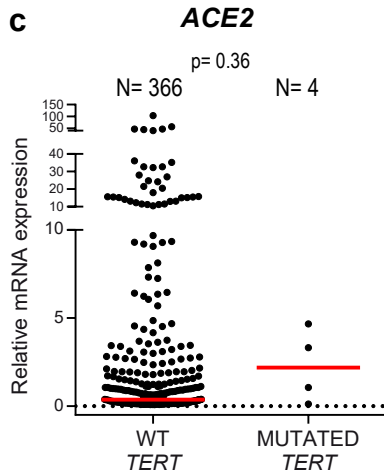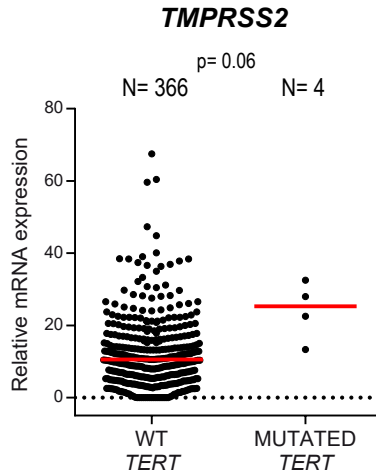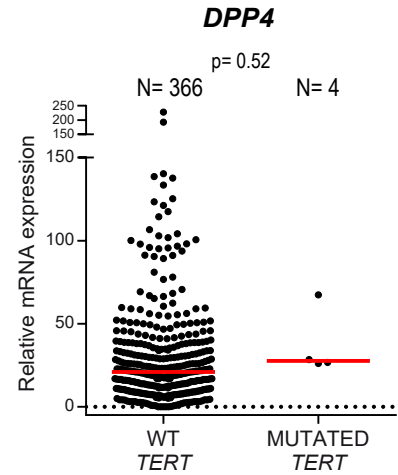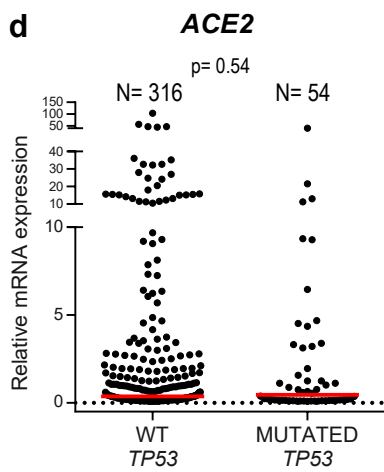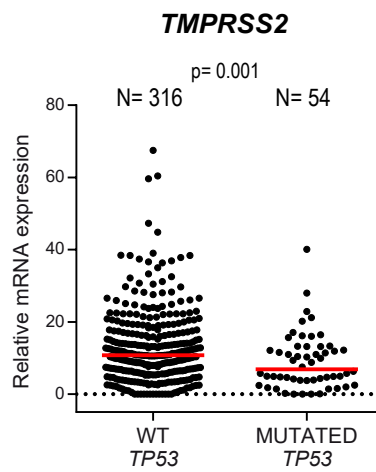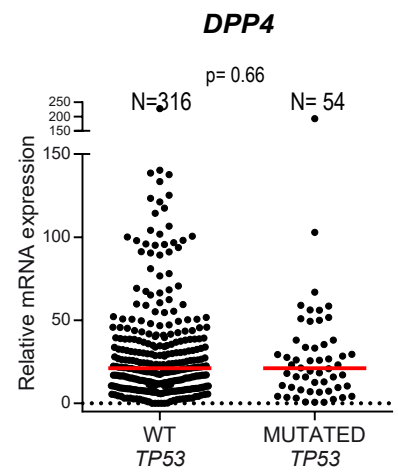

Supplement: 41598_2021_3710_MOESM4_ESM.pdf [file 41598_2021_3710_MOESM4_ESM.pdf]
