# Supplementary material for: Well-differentiated liver cancers reveal the potential link between ACE2 dysfunction and metabolic breakdown
Source: PubMed Central journal article supplement (PMC8814043; doi:10.1038/s41598-021-03710-0), 2022-02-03

a

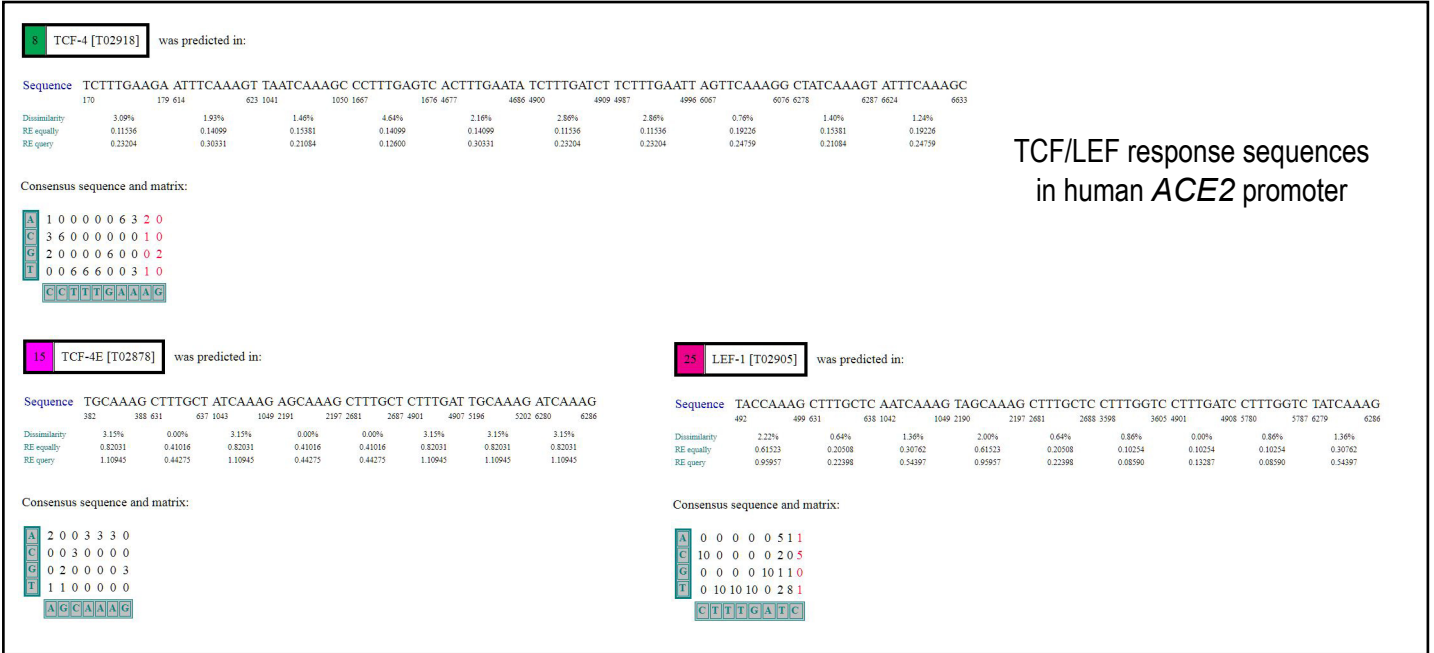

b

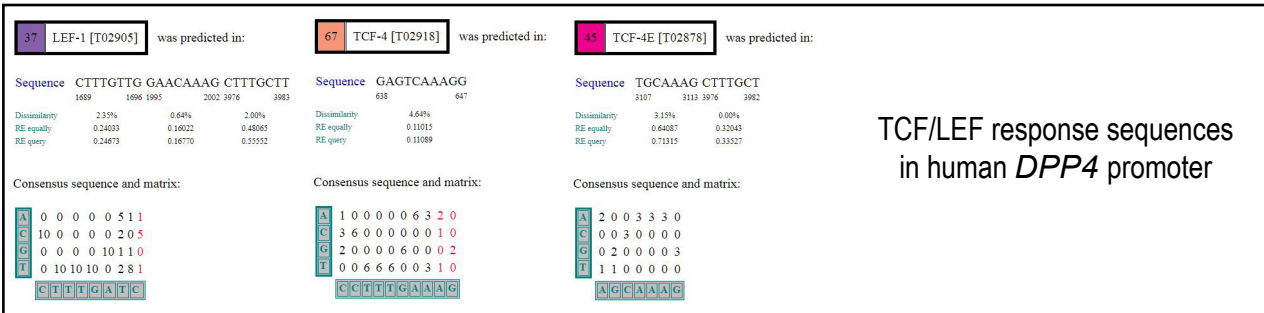

Supplement: 41598_2021_3710_MOESM5_ESM.pdf [file 41598_2021_3710_MOESM5_ESM.pdf]
