# Supplementary material for: Well-differentiated liver cancers reveal the potential link between ACE2 dysfunction and metabolic breakdown
Source: PubMed Central journal article supplement (PMC8814043; doi:10.1038/s41598-021-03710-0), 2022-02-03
Supplement: 41598_2021_3710_MOESM6_ESM.pdf [file 41598_2021_3710_MOESM6_ESM.pdf]

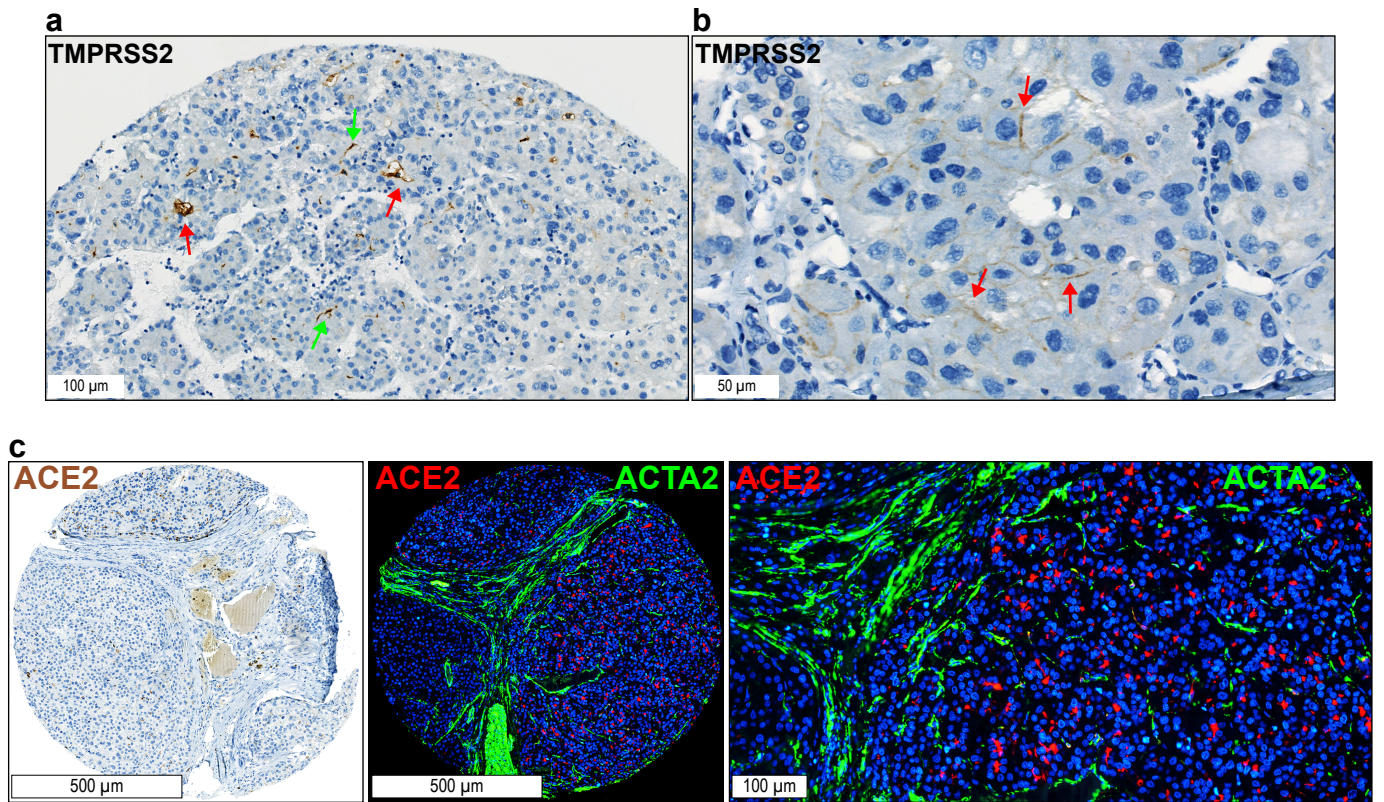

Desquilles et al., Supplementary Fig. 5
