# Supplementary material for: Well-differentiated liver cancers reveal the potential link between ACE2 dysfunction and metabolic breakdown
Source: PubMed Central journal article supplement (PMC8814043; doi:10.1038/s41598-021-03710-0), 2022-02-03
Supplement: 41598_2021_3710_MOESM9_ESM.pdf [file 41598_2021_3710_MOESM9_ESM.pdf]

DNA methylation in 291 HCCs carrying wild-type CTNNB1 and 79 HCCs carrying mutated *CTNNB1* from the TCGA dataset

| Gene symbol           | logFC        | AveExpr      | <i>t</i>     | P.Value  | adj.P.Val   | B           | abs         |
|-----------------------|--------------|--------------|--------------|----------|-------------|-------------|-------------|
| <b><i>TMPRSS2</i></b> | 1,030306228  | -1,302330529 | 5,423771614  | 9,78E-08 | 3,27E-06    | 5,922974484 | 1,030306228 |
| <b><i>ACE2</i></b>    | -0,602063465 | 0,636097685  | -4,558113165 | 6,74E-06 | 9,21E-05    | 1,834523098 | 0,602063465 |
| <b><i>DPP4</i></b>    | 0,472521117  | 2,05063653   | 4,344378674  | 1,75E-05 | 0,000195669 | 0,923653403 | 0,472521117 |
