# Supplementary material for: Well-differentiated liver cancers reveal the potential link between ACE2 dysfunction and metabolic breakdown
Source: PubMed Central journal article supplement (PMC8814043; doi:10.1038/s41598-021-03710-0), 2022-02-03
Supplement: 41598_2021_3710_MOESM11_ESM.pdf [file 41598_2021_3710_MOESM11_ESM.pdf]

**Ontology of genes correlating with ACE2 (correlation coefficient > +0.25) in 226 human hepatocellular carcinomas expressing  $\beta$ -catenin activation signatures  
(Desert's dataset of 1133 human HCCs)**

```
# species: Homo sapiens
# support: EXP, IMP, ISS, ISM, TAS, IEA, HMP, HEP, IDA, IGI, ISO, IGC, NAS, HGI, IPI, IEP, ISA, RCA, IC, HDA
# associations retrieved on: 2020-04-25 04:31:06-04
# gofunc built on: 2018-02-21 10:04:34.764444-05
# gene associations file: ftp://ftp.geneontology.org/pub/go/gene-associations/goa_human.gaf.gz
# revision: 2018-02-02 $
# downloaded on: 2018-02-14 09:47:26-05
# GO DAG files from: http://archive.geneontology.org/latest-full/go_201512-termdb-tables.tar.gz
# downloaded on: 2015-12-22 05:43:21-05
# translation required: yes
# translation info:
# authority: ensembl
# synergizer db built on: 2015-11-17 14:24:21.26681-05
# synergizer db built from: Ensembl Genes 82 / Metazoa Mart / Plant Mart
# namespace: hgnc_symbol
# coverage: 99.8%
# size of "genespace": 18224
# number of attributes: 20270
# NOTE: the last record consists of all the entities in the
# "genespace" that are not associated with any attribute (for
# the requested support).
# Original number of entities in query: 253
# Number of entities in query: 253
# Total number of entities: 18232
# Original total number of entities: 18224
# Entities not in default gene space: 8
# Total number of attributes: 20270
# Translation required: yes
# Translation coverage: 0.997782
# Mode: unordered
# Number of simulations: 1000
# Adjusted P-value cutoff: 0.05
# Over/under: both
# Evidence codes: EXP, IMP, ISS, ISM, TAS, IEA, HMP, HEP, IDA, IGI, ISO, IGC, NAS, HGI, IPI, IEP, ISA, RCA, IC, HDA
```

OVERREPRESENTED ATTRIBUTES

| N  | X    | LOD         | P        | P_adj  | attrib ID   | attrib name                                   |
|----|------|-------------|----------|--------|-------------|-----------------------------------------------|
| 3  | 3    | 2,70106792  | 2,64E-06 | 0,01   | GO:0004165  | dodecenoyl-CoA delta-isomerase activity       |
| 5  | 20   | 1,409119732 | 6,47E-06 | 0,019  | GO:0016878  | acid-thiol ligase activity                    |
| 6  | 27   | 1,341169752 | 1,56E-06 | 0,001  | GO:0006699  | bile acid biosynthetic process                |
| 7  | 37   | 1,252996856 | 6,58E-07 | 0,001  | GO:0008206  | bile acid metabolic process                   |
| 7  | 42   | 1,186947349 | 1,63E-06 | 0,001  | GO:0006094  | gluconeogenesis                               |
| 7  | 45   | 1,15164236  | 2,64E-06 | 0,006  | GO:0019319  | hexose biosynthetic process                   |
| 6  | 39   | 1,14827311  | 1,50E-05 | 0,046  | GO:0016877  | ligase activity, forming carbon-sulfur bonds  |
| 7  | 50   | 1,098492785 | 5,48E-06 | 0,017  | GO:0046364  | monosaccharide biosynthetic process           |
| 14 | 102  | 1,087765967 | 1,38E-10 | <0.001 | GO:0072329  | monocarboxylic acid catabolic process         |
| 11 | 81   | 1,080880442 | 1,52E-08 | <0.001 | GO:0005496  | steroid binding                               |
| 7  | 52   | 1,078922217 | 7,16E-06 | 0,021  | GO:0006635  | fatty acid beta-oxidation                     |
| 7  | 54   | 1,06019157  | 9,26E-06 | 0,025  | GO:0003707  | steroid hormone receptor activity             |
| 11 | 96   | 0,996739551 | 9,22E-08 | <0.001 | GO:0005508  | lipid homeostasis                             |
| 11 | 97   | 0,991665288 | 1,03E-07 | <0.001 | GO:0005777  | peroxisome                                    |
| 10 | 90   | 0,981735353 | 4,79E-07 | 0,001  | GO:0044438  | microbody part                                |
| 10 | 90   | 0,981735353 | 4,79E-07 | 0,001  | GO:0044439  | peroxisomal part                              |
| 11 | 102  | 0,967138929 | 1,73E-07 | <0.001 | GO:0006805  | xenobiotic metabolic process                  |
| 8  | 76   | 0,956808815 | 1,03E-05 | 0,025  | GO:00051289 | protein homotetramerization                   |
| 12 | 118  | 0,938852875 | 9,13E-08 | <0.001 | GO:0042579  | microbody                                     |
| 8  | 79   | 0,938120599 | 1,37E-05 | 0,045  | GO:0009062  | fatty acid catabolic process                  |
| 19 | 208  | 0,892470704 | 9,70E-11 | <0.001 | GO:0016054  | organic acid catabolic process                |
| 19 | 208  | 0,892470704 | 9,70E-11 | <0.001 | GO:0046395  | carboxylic acid catabolic process             |
| 11 | 120  | 0,888708682 | 9,05E-07 | 0,001  | GO:0006694  | steroid biosynthetic process                  |
| 16 | 179  | 0,879124965 | 4,18E-09 | <0.001 | GO:0050662  | coenzyme binding                              |
| 19 | 241  | 0,821943572 | 1,19E-09 | <0.001 | GO:0048037  | cofactor binding                              |
| 18 | 244  | 0,789396595 | 9,43E-09 | <0.001 | GO:0008202  | steroid metabolic process                     |
| 32 | 465  | 0,773711029 | 7,81E-14 | <0.001 | GO:0032787  | monocarboxylic acid metabolic process         |
| 11 | 156  | 0,764384042 | 1,17E-05 | 0,041  | GO:0072330  | monocarboxylic acid biosynthetic process      |
| 23 | 337  | 0,757902217 | 3,56E-10 | <0.001 | GO:0044282  | small molecule catabolic process              |
| 18 | 274  | 0,734642937 | 5,64E-08 | <0.001 | GO:0006631  | fatty acid metabolic process                  |
| 12 | 188  | 0,717753557 | 1,29E-05 | 0,042  | GO:1901617  | organic hydroxy compound biosynthetic process |
| 19 | 318  | 0,69098948  | 1,07E-07 | <0.001 | GO:0006790  | sulfur compound metabolic process             |
| 15 | 252  | 0,686194515 | 2,54E-06 | 0,006  | GO:0016042  | lipid catabolic process                       |
| 43 | 787  | 0,679796341 | 1,00E-14 | <0.001 | GO:0019752  | carboxylic acid metabolic process             |
| 14 | 239  | 0,678224385 | 6,63E-06 | 0,019  | GO:0016053  | organic acid biosynthetic process             |
| 14 | 239  | 0,678224385 | 6,63E-06 | 0,019  | GO:0046394  | carboxylic acid biosynthetic process          |
| 24 | 426  | 0,668574616 | 6,68E-09 | <0.001 | GO:0044283  | small molecule biosynthetic process           |
| 47 | 908  | 0,659983979 | 3,66E-15 | <0.001 | GO:0006082  | organic acid metabolic process                |
| 46 | 891  | 0,657192676 | 8,31E-15 | <0.001 | GO:0043436  | oxoacid metabolic process                     |
| 14 | 256  | 0,64624315  | 1,45E-05 | 0,045  | GO:0006732  | coenzyme metabolic process                    |
| 18 | 338  | 0,636331186 | 1,25E-06 | 0,001  | GO:0005759  | mitochondrial matrix                          |
| 18 | 387  | 0,573338061 | 8,30E-06 | 0,022  | GO:0015711  | organic anion transport                       |
| 36 | 857  | 0,544705354 | 2,87E-09 | <0.001 | GO:0055114  | oxidation-reduction process                   |
| 31 | 770  | 0,518592217 | 1,05E-07 | <0.001 | GO:0044712  | single-organism catabolic process             |
| 20 | 486  | 0,517988275 | 1,58E-05 | 0,046  | GO:1901615  | organic hydroxy compound metabolic process    |
| 61 | 1660 | 0,514787292 | 9,20E-13 | <0.001 | GO:0044281  | small molecule metabolic process              |
| 25 | 653  | 0,488685719 | 4,74E-06 | 0,015  | GO:0016491  | oxidoreductase activity                       |
| 42 | 1159 | 0,481752989 | 9,41E-09 | <0.001 | GO:0006629  | lipid metabolic process                       |
| 31 | 898  | 0,446024516 | 2,80E-06 | 0,011  | GO:0070013  | intracellular organelle lumen                 |
| 30 | 908  | 0,424314751 | 9,70E-06 | 0,025  | GO:0044255  | cellular lipid metabolic process              |
| 45 | 1474 | 0,402532296 | 4,00E-07 | 0,001  | GO:1901564  | organonitrogen compound metabolic process     |
| 34 | 1093 | 0,399696802 | 8,56E-06 | 0,024  | GO:0043233  | organelle lumen                               |
| 36 | 1167 | 0,397740287 | 5,44E-06 | 0,017  | GO:0031974  | membrane-enclosed lumen                       |
| 75 | 2739 | 0,385824186 | 1,98E-09 | <0.001 | GO:1903561  | extracellular vesicle                         |
| 75 | 2740 | 0,385632867 | 2,01E-09 | <0.001 | GO:0043230  | extracellular organelle                       |
| 74 | 2721 | 0,380868824 | 3,60E-09 | <0.001 | GO:0070062  | extracellular exosome                         |
| 74 | 2722 | 0,38067649  | 3,66E-09 | <0.001 | GO:0065010  | extracellular membrane-bounded organelle      |
| 79 | 3118 | 0,350134681 | 2,17E-08 | <0.001 | GO:0031988  | membrane-bounded vesicle                      |
| 86 | 3563 | 0,333177032 | 3,72E-08 | <0.001 | GO:0044421  | extracellular region part                     |
| 80 | 3303 | 0,327152089 | 1,25E-07 | <0.001 | GO:0031982  | vesicle                                       |

|     |      |             |          |        |            |                                   |
|-----|------|-------------|----------|--------|------------|-----------------------------------|
| 95  | 4074 | 0,326289142 | 2,63E-08 | <0.001 | GO:0044710 | single-organism metabolic process |
| 101 | 4931 | 0,258113352 | 5,26E-06 | 0,017  | GO:0003824 | catalytic activity                |
| 160 | 9049 | 0,244373863 | 7,86E-06 | 0,021  | GO:0043227 | membrane-bounded organelle        |

UNDERREPRESENTED ATTRIBUTES

| N | X | LOD | P | P_adj | attrib ID | attrib name |
|---|---|-----|---|-------|-----------|-------------|
|---|---|-----|---|-------|-----------|-------------|
