# Supplementary material for: Well-differentiated liver cancers reveal the potential link between ACE2 dysfunction and metabolic breakdown
Source: PubMed Central journal article supplement (PMC8814043; doi:10.1038/s41598-021-03710-0), 2022-02-03
Supplement: 41598_2021_3710_MOESM12_ESM.pdf [file 41598_2021_3710_MOESM12_ESM.pdf]

**Ontology of genes correlating with ACE2 (correlation coefficient < -0.25) in 226 human hepatocellular carcinomas expressing  $\beta$ -catenin activation signatures  
(Désert's dataset of 1133 human HCCs)**

```
# species: Homo sapiens
# support: EXP, IMP, ISS, ISM, TAS, IEA, HMP, HEP, IDA, IGI, ISO, IGC, NAS, HGI, IPI, IEP, ISA, RCA, IC, HDA
# associations retrieved on: 2020-04-25 04:48:24-04
# gofunc built on: 2018-02-21 10:04:34.764444-05
# gene associations file: ftp://ftp.geneontology.org/pub/go/gene-associations/goa_human.gaf.gz
# revision: 2018-02-02 $
# downloaded on: 2018-02-14 09:47:26-05
# GO DAG files from: http://archive.geneontology.org/latest-full/go_201512-termdb-tables.tar.gz
# downloaded on: 2015-12-22 05:43:21-05
# translation required: yes
# translation info:
# authority: ensembl
# synergizer db built on: 2015-11-17 14:24:21.26681-05
# synergizer db built from: Ensembl Genes 82 / Metazoa Mart / Plant Mart
# namespace: hgnc_symbol
# coverage: 99.8%
# size of "genespace": 18224
# number of attributes: 20270
# NOTE: the last record consists of all the entities in the
# "genespace" that are not associated with any attribute (for
# the requested support).
# Original number of entities in query: 141
# Number of entities in query: 141
# Total number of entities: 18230
# Original total number of entities: 18224
# Entities not in default gene space: 6
# Total number of attributes: 20270
# Translation required: yes
# Translation coverage: 0.997782
# Mode: unordered
# Number of simulations: 1000
# Adjusted P-value cutoff: 0.05
# Over/under: both
# Evidence codes: EXP, IMP, ISS, ISM, TAS, IEA, HMP, HEP, IDA, IGI, ISO, IGC, NAS, HGI, IPI, IEP, ISA, RCA, IC, HDA
```

OVERREPRESENTED ATTRIBUTES

| N   | X     | LOD         | P        | P_adj  | attrib ID  | attrib name                                  |
|-----|-------|-------------|----------|--------|------------|----------------------------------------------|
| 8   | 129   | 0,973873206 | 7,28E-06 | 0,022  | GO:0000086 | G2/M transition of mitotic cell cycle        |
| 8   | 131   | 0,966734184 | 8,15E-06 | 0,022  | GO:0044839 | cell cycle G2/M phase transition             |
| 12  | 233   | 0,891354611 | 2,67E-07 | 0,001  | GO:0044772 | mitotic cell cycle phase transition          |
| 12  | 241   | 0,875751167 | 3,84E-07 | 0,002  | GO:0044770 | cell cycle phase transition                  |
| 24  | 601   | 0,800924377 | 3,59E-11 | <0.001 | GO:1903047 | mitotic cell cycle process                   |
| 27  | 966   | 0,641907209 | 5,19E-09 | 0,001  | GO:0022402 | cell cycle process                           |
| 18  | 638   | 0,62504346  | 2,15E-06 | 0,015  | GO:0019221 | cytokine-mediated signaling pathway          |
| 66  | 4767  | 0,399370176 | 9,73E-08 | 0,001  | GO:0005829 | cytosol                                      |
| 38  | 2445  | 0,38436938  | 1,42E-05 | 0,034  | GO:0043228 | non-membrane-bounded organelle               |
| 38  | 2445  | 0,38436938  | 1,42E-05 | 0,034  | GO:0043232 | intracellular non-membrane-bounded organelle |
| 108 | 10883 | 0,342132144 | 1,65E-05 | 0,043  | GO:0005515 | protein binding                              |

UNDERREPRESENTED ATTRIBUTES

| N | X | LOD | P | P_adj | attrib ID | attrib name |
|---|---|-----|---|-------|-----------|-------------|
|---|---|-----|---|-------|-----------|-------------|
