# Supplementary material for: Well-differentiated liver cancers reveal the potential link between ACE2 dysfunction and metabolic breakdown
Source: PubMed Central journal article supplement (PMC8814043; doi:10.1038/s41598-021-03710-0), 2022-02-03
Supplement: 41598_2021_3710_MOESM13_ESM.pdf [file 41598_2021_3710_MOESM13_ESM.pdf]

| SPOT | SAMPLE TYPE          | CTNNB1 MUTATION EXON 3 | GLUL MEAN SCORES | ACE2 MEAN SCORES  | β-catenin ACTIVATION SCORE |
|------|----------------------|------------------------|------------------|-------------------|----------------------------|
| A01  | NORMAL LIVER CONTROL | not applied            | unavailable spot | unavailable spot  | 0                          |
| A02  |                      |                        | not applied      | not applied       |                            |
| A03  |                      |                        |                  | unavailable spot  |                            |
| A04  | NORMAL LIVER CONTROL | not applied            | not applied      | unavailable spots | 0                          |
| A05  |                      |                        |                  |                   |                            |
| A06  |                      |                        |                  |                   |                            |
| A07  | HCC                  | 1                      | 0.0              | 2.0               | 1                          |
| A08  |                      |                        |                  |                   |                            |
| A09  |                      |                        |                  |                   |                            |
| A10  | HCC                  | 0                      | 0.0              | 1.0               | 9                          |
| A11  |                      |                        |                  |                   |                            |
| A12  |                      |                        |                  |                   |                            |
| B01  | HCC                  | 1                      | 0.0              | 0.0               | 0                          |
| B02  |                      |                        |                  |                   |                            |
| B03  |                      |                        |                  |                   |                            |
| B04  | HCC                  | 1                      | 2.5              | 0.0               | 9                          |
| B05  |                      |                        |                  |                   |                            |
| B06  |                      |                        |                  |                   |                            |
| B07  | HCC                  | 1                      | 2.0              | 1.0               | 0                          |
| B08  |                      |                        |                  |                   |                            |
| B09  |                      |                        |                  |                   |                            |
| B10  | HCC                  | 0                      | 1.0              | 1.0               | 6                          |
| B11  |                      |                        |                  |                   |                            |
| B12  |                      |                        |                  |                   |                            |
| C01  | HCC                  | 1                      | 0.0              | 3.0               | 9                          |
| C02  |                      |                        |                  |                   |                            |
| C03  |                      |                        |                  |                   |                            |
| C04  | HCC                  | 1                      | 2.0              | 2.0               | 12                         |
| C05  |                      |                        |                  |                   |                            |
| C06  |                      |                        |                  |                   |                            |
| C07  | HCC                  | 1                      | 3.0              | 3.0               | 8                          |
| C08  |                      |                        |                  |                   |                            |
| C09  |                      |                        |                  |                   |                            |
| C10  | HCC                  | 1                      | 4.0              | 3.0               | 9                          |
| C11  |                      |                        |                  |                   |                            |
| C12  |                      |                        |                  |                   |                            |
| C13  | HCC                  | 0                      | 0.0              | 1.0               | 6                          |
| C14  |                      |                        |                  |                   |                            |
| C15  |                      |                        |                  |                   |                            |
| D01  | HCC                  | 1                      | 1.7              | 1.0               | 3                          |
| D02  |                      |                        |                  |                   |                            |
| D03  |                      |                        |                  |                   |                            |
| D04  | HCC                  | 1                      | 3.0              | unavailable spots | 12                         |
| D05  |                      |                        |                  |                   |                            |
| D06  |                      |                        |                  |                   |                            |
| D07  | HCC                  | 1                      | 4.0              | 4.0               | 16                         |
| D08  |                      |                        |                  |                   |                            |
| D09  |                      |                        |                  |                   |                            |
| D10  | HCC                  | 1                      | 3.0              | 2.0               | 4                          |
| D11  |                      |                        |                  |                   |                            |
| D12  |                      |                        |                  |                   |                            |
| D13  | HCC                  | 1                      | 3.0              | 3.0               | 16                         |
| D14  |                      |                        |                  |                   |                            |
| D15  |                      |                        |                  |                   |                            |
| E01  | HCC                  | 1                      | 3.0              | 3.0               | 6                          |
| E02  |                      |                        |                  |                   |                            |
| E03  |                      |                        |                  |                   |                            |
| E04  | HCC                  | 1                      | 2.5              | 3.0               | 12                         |
| E05  |                      |                        |                  |                   |                            |
| E06  |                      |                        |                  |                   |                            |
| E07  | HCC                  | 1                      | 4.0              | 4.0               | 20                         |
| E08  |                      |                        |                  |                   |                            |
| E09  |                      |                        |                  |                   |                            |
| E10  | HCC                  | 1                      | 2.5              | 3.0               | 16                         |
| E11  |                      |                        |                  |                   |                            |
| E12  |                      |                        |                  |                   |                            |
| E13  | HCC                  | 1                      | 4.0              | 3.0               | 16                         |
| E14  |                      |                        |                  |                   |                            |
| E15  |                      |                        |                  |                   |                            |
| F01  | HCC                  | 0                      | 2.5              | 0.0               | 16                         |
| F02  |                      |                        |                  |                   |                            |
| F03  |                      |                        |                  |                   |                            |
| F04  | HCC                  | 0                      | 0.0              | 0.0               | 0                          |
| F05  |                      |                        |                  |                   |                            |
| F06  |                      |                        |                  |                   |                            |
| F07  | HCC                  | 0                      | 1.0              | 1.0               | 3                          |
| F08  |                      |                        |                  |                   |                            |
| F09  |                      |                        |                  |                   |                            |
| F10  | HCC                  | 0                      | 0.0              | 0.0               | 0                          |
| F11  |                      |                        |                  |                   |                            |
| F12  |                      |                        |                  |                   |                            |
| F13  | HCC                  | 0                      | 0.0              | 1.0               | -2                         |
| F14  |                      |                        |                  |                   |                            |
| F15  |                      |                        |                  |                   |                            |
| G01  | HCC                  | 0                      | 0.0              | unavailable spots | 0                          |
| G02  |                      |                        |                  |                   |                            |
| G03  |                      |                        |                  |                   |                            |
| G04  | HCC                  | 0                      | 0.0              | 0.0               | 0                          |
| G05  |                      |                        |                  |                   |                            |
| G06  |                      |                        |                  |                   |                            |
| G07  | HCC                  | 0                      | 1.5              | 1.2               | 9                          |
| G08  |                      |                        |                  |                   |                            |
| G09  |                      |                        |                  |                   |                            |
| G10  | HCC                  | 0                      | 0.0              | 0.5               | 2                          |
| G11  |                      |                        |                  |                   |                            |
| G12  |                      |                        |                  |                   |                            |
| G13  | HCC                  | 0                      | 0.0              | 0.0               | 4                          |
| G14  |                      |                        |                  |                   |                            |
| G15  |                      |                        |                  |                   |                            |
| H01  | HCC                  | 0                      | 0.3              | 0.3               | 6                          |
| H02  |                      |                        |                  |                   |                            |
| H03  |                      |                        |                  |                   |                            |
| H04  | HCC                  | 0                      | 1.0              | 1.7               | -1                         |
| H05  |                      |                        |                  |                   |                            |
| H06  |                      |                        |                  |                   |                            |
| H07  | HCC                  | 1                      | 4.0              | 1.0               | 16                         |
| H08  |                      |                        |                  |                   |                            |
| H09  |                      |                        |                  |                   |                            |
| H10  | HCC                  | 0                      | 1.7              | 1.7               | -2                         |
| H11  |                      |                        |                  |                   |                            |
| H12  |                      |                        |                  |                   |                            |
| H13  | HCC                  | 0                      | 0.0              | unavailable spots | 0                          |
| H14  |                      |                        |                  |                   |                            |
| H15  |                      |                        |                  |                   |                            |
| I01  | HCC                  | 0                      | 0.0              | 0.0               | 0                          |
| I02  |                      |                        |                  |                   |                            |
| I03  |                      |                        |                  |                   |                            |
| I04  | HCC                  | 0                      | 1.0              | 0.0               | 0                          |
| I05  |                      |                        |                  |                   |                            |
| I06  |                      |                        |                  |                   |                            |
| I07  | HCC                  | 0                      | 0.0              | 1.0               | -2                         |
| I08  |                      |                        |                  |                   |                            |
| I09  |                      |                        |                  |                   |                            |
| I10  | HCC                  | 0                      | 0.0              | 1.0               | -1                         |
| I11  |                      |                        |                  |                   |                            |
| I12  |                      |                        |                  |                   |                            |
| I13  | HCC                  | 0                      | 1.0              | 1.3               | 4                          |
| I14  |                      |                        |                  |                   |                            |
| I15  |                      |                        |                  |                   |                            |
