# Supplementary material for: Well-differentiated liver cancers reveal the potential link between ACE2 dysfunction and metabolic breakdown
Source: PubMed Central journal article supplement (PMC8814043; doi:10.1038/s41598-021-03710-0), 2022-02-03
Supplement: 41598_2021_3710_MOESM14_ESM.pdf [file 41598_2021_3710_MOESM14_ESM.pdf]

| Specificity              | Clone       | Isotype     | Antigen retrieval                                 | Stainer kit           | Signal amplification                         | Incubation conditions | Supplier   | Dilution | Secondary Antibody | Test type          |
|--------------------------|-------------|-------------|---------------------------------------------------|-----------------------|----------------------------------------------|-----------------------|------------|----------|--------------------|--------------------|
| <b>ACE2</b>              | CL4035      | IgG1        | pH8 - Ultra Cell Conditional Solution (Ultra CC1) | Ventana Omnimap       | Non used                                     | 60 min, 37°C          | Invitrogen | 1/800    | anti-mouse HRP     | immunoperoxidase   |
| <b>TMPRSS2</b>           | P5H9-A3     | IgG1-Kappa  | pH8 - Ultra Cell Conditional Solution (Ultra CC1) | Ventana Omnimap       | Non used                                     | 60 min, 37°C          | Merck      | 1/200    | anti-mouse HRP     | immunoperoxidase   |
| <b>ACE2</b>              | CL4035      | IgG         | pH8 - Ultra Cell Conditional Solution (Ultra CC1) | Ventana Rhodamine kit | HRP enzyme kit Tyramide signal amplification | 60 min, 37°C          | Invitrogen | 1/800    | anti-mouse HRP     | immunofluorescence |
| <b>CD34</b>              | SI16-01     | IgG         | pH8 - Ultra Cell Conditional Solution (Ultra CC1) | Ventana Fam kit       | HRP enzyme kit Tyramide signal amplification | 60 min, 37°C          | Invitrogen | 1/500    | anti-rabbit-HRP    | immunofluorescence |
| <b>CLEC4M (DC-SIGNR)</b> | EPR11211    | IgG         | pH8 - Ultra Cell Conditional Solution (Ultra CC1) | Ventana Fam kit       | HRP enzyme kit Tyramide signal amplification | 60 min, 37°C          | Abcam      | 1/750    | anti-rabbit-HRP    | immunofluorescence |
| <b>ABCC2 (MRP2)</b>      | EPR10997(2) | IgG         | pH8 - Ultra Cell Conditional Solution (Ultra CC1) | Ventana Fam kit       | HRP enzyme kit Tyramide signal amplification | 60 min, 37°C          | Abcam      | 1/500    | anti-rabbit-HRP    | immunofluorescence |
| <b>ACTA2 (α-SMA)</b>     | 1A4         | IgG2a Kappa | pH8 - Ultra Cell Conditional Solution (Ultra CC1) | Ventana Fam kit       | HRP enzyme kit Tyramide signal amplification | 60 min, 37°C          | Invitrogen | 1/200    | anti-mouse HRP     | immunofluorescence |
